# Supplementary material for: Effect of thiamine supplementation on glycaemic outcomes in adults with type 2 diabetes: a systematic review and meta-analysis
Source: HighWire-hosted journal article supplement (doi:10.1136/bmjopen-2021-059834), 2022-08-01
Supplement: bmjopen-2021-059834supp003_data_supplement.pdf [file bmjopen-2021-059834supp003_data_supplement.pdf]

Table of included study characteristics

| Study                      | Country     | Setting/context                                                                                            | Participant characteristics                                                                                                                           | Groups                                                                         | Outcomes measured                                   | Description of main results                                                                           |
|----------------------------|-------------|------------------------------------------------------------------------------------------------------------|-------------------------------------------------------------------------------------------------------------------------------------------------------|--------------------------------------------------------------------------------|-----------------------------------------------------|-------------------------------------------------------------------------------------------------------|
| Stracke 2008 <sup>34</sup> | Germany     | Double-blind, randomised, placebo-controlled phase-III study was performed in 10 study centres in Germany. | 165 patients with type 1 or type 2 diabetes mellitus<br>Mean age 60 years<br>Males 56% vs females 44 %<br>Mean duration of diabetes mellitus 12 years | Group 1: benfotiamine 200mg<br>Group: 2 benfotiamine 100mg<br>Group 3: placebo | HbA1c, FBG, BP at six weeks                         | The mean HbA1c was 7.7 %.                                                                             |
| Rabbani 2008 <sup>25</sup> | Pakistan    | Patients attending the Diabetes Clinic, Sheikh Zayed Hospital, Lahore, Pakistan                            | 40 patients with type 2 diabetes<br>Age range age 35–65 years<br>Diabetes duration ≥5 years<br>BMI 19–40 kg/m <sup>2</sup> .                          | Group 1: High-dose thiamine therapy (300 mg/day)<br>Group 2: placebo           | HbA1c, FBG, BMI, BP, HDL, Triglycerides at 3 months | There was no effect of thiamine treatment on glycaemic control, dyslipidaemia or BP.                  |
| Alkhalaf. 2010.            | Netherlands | Participants attending the Isala Clinics (Zwolle, the Netherlands).                                        | 82 patients with type 2 diabetes<br>Age range 40–75 years                                                                                             | Group 1: Benfotiamine (900 mg/day)<br>Group 2: placebo                         | HbA1c, FBG, BMI, BP, HDL, Triglycerides at 12 weeks | Compared with placebo, benfotiamine treatment did not demonstrate a significant improvement in HbA1c. |

Table of included study characteristics

|                                   |            |                                                                                           |                                                                                                          |                                                                                               |                                                             |                                                                                                                                                                                                                                                                                                                                                   |
|-----------------------------------|------------|-------------------------------------------------------------------------------------------|----------------------------------------------------------------------------------------------------------|-----------------------------------------------------------------------------------------------|-------------------------------------------------------------|---------------------------------------------------------------------------------------------------------------------------------------------------------------------------------------------------------------------------------------------------------------------------------------------------------------------------------------------------|
| Shahmiri 2013 <sup>48</sup>       | Australia  | Subjects who attended the out-patient clinic, School of Public Health, Curtin University. | 17 hyperglycemic subjects (14 IGT, 3 T2DM)<br>Age range 18-75 years<br>BMI 19-40 kg/m <sup>2</sup>       | Group 1: 100 mg thiamine (as thiamine hydrochloride)<br>Group 2: placebo                      | FBG, and BMI at 3 weeks                                     | Thiamine supplementation resulted in significant decreases in 2-h plasma glucose relative to baseline (8.78±2.20 mmol/l vs. 9.89±2.50, p = 0.004), with no significant change in the placebo arm. Fasting plasma glucose increased significantly from baseline after 6 weeks in the placebo arm (p = 0.003, p = 0.04 and p = 0.02, respectively). |
| Gonzalez-Ortiz 2010 <sup>15</sup> | Mexico/USA | Community                                                                                 | 24 patients with T2DM or overweight or obesity<br>Age range 30 – 65 years<br>BMI 25–40 kg/m <sup>2</sup> | Group 1: Thiamine orally (150 mg), once daily for one month (n=12)<br>Group 2: placebo (n=12) | HbA1c, FBG, HDL-c, LDL-c, Triglycerides, BP, BMI at 1 month | Significant decreases in glucose (6.7 ± 1.0 mmol/l vs. 6.0 ± 1.0 mmol/l, p = 0.024) before and after the intervention, with thiamine administration. There were no changes with the rest of the measurements.                                                                                                                                     |
| Winkler 1999 <sup>24</sup>        | Hungary    | Unclear                                                                                   | 36 patients with T2DM and IDDM<br>Age range 40-70 years.                                                 | Group A: 4 x 2 capsules of a complex B-vitamin preparation, (320mg/day benfotiamine) (n=12)   | HbA1c, FBG, Triglycerides at 6 weeks.                       | No differences in metabolic outcomes between the three groups.                                                                                                                                                                                                                                                                                    |

Table of included study characteristics

|  |  |  |  |                                                                                                                                                                                  |  |  |
|--|--|--|--|----------------------------------------------------------------------------------------------------------------------------------------------------------------------------------|--|--|
|  |  |  |  | Group B: daily doses of only 3 x 1 capsules of the complex B-vitamin preparation (120mg/day benfotiamine)(n=12)<br><br>Group C: pure benfotiamine (150mg/day benfotiamine)(n=12) |  |  |
|--|--|--|--|----------------------------------------------------------------------------------------------------------------------------------------------------------------------------------|--|--|
